# Supplementary material for: Bacterial Phylogenetic Reconstruction from Whole Genomes Is Robust to Recombination but Demographic Inference Is Not
Source: PubMed Central journal article supplement (PMC4251999; doi:10.1128/mbio.02158-14), 2014-11-25

# Figure S1

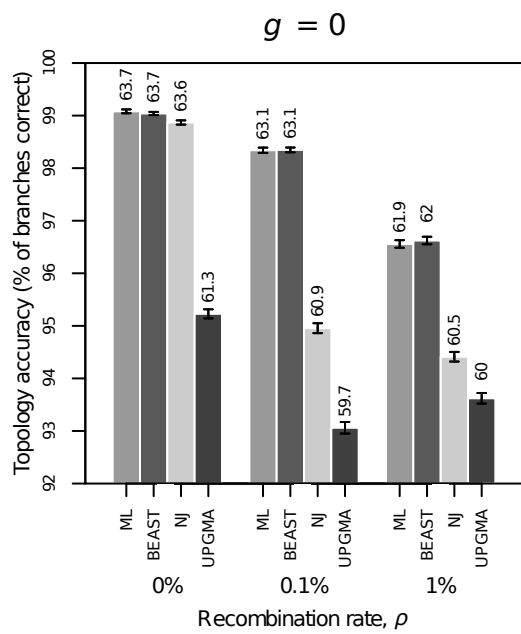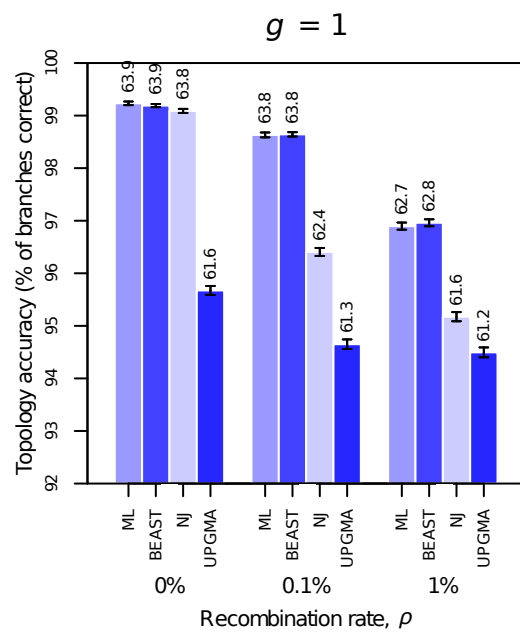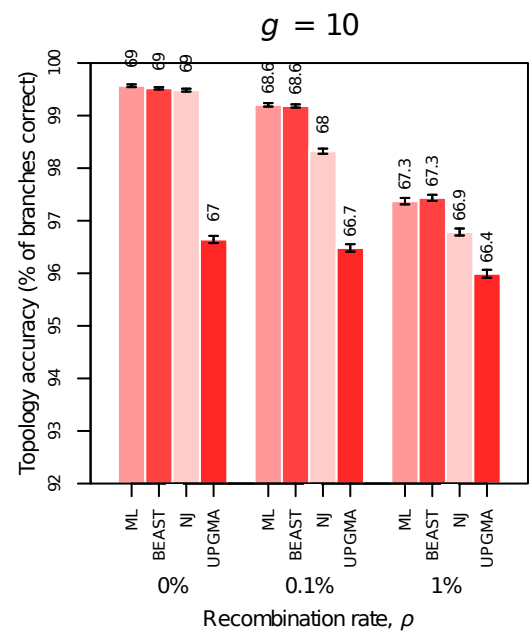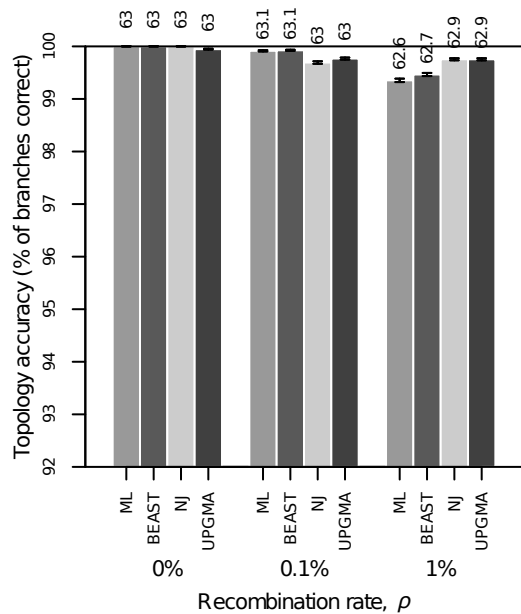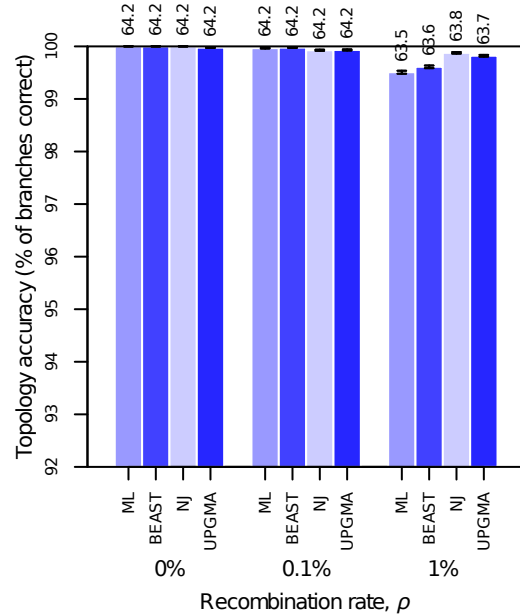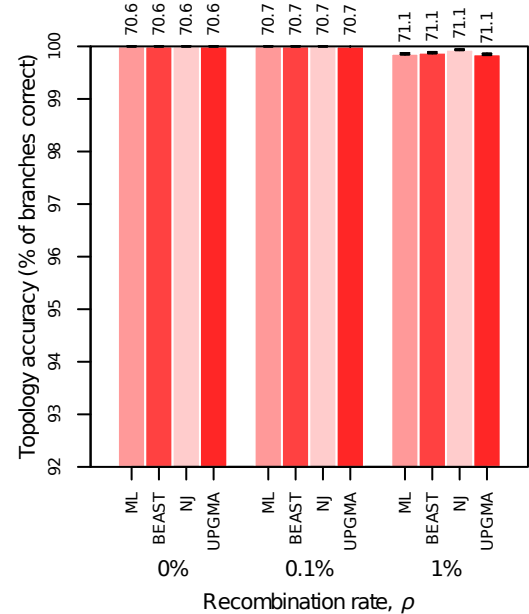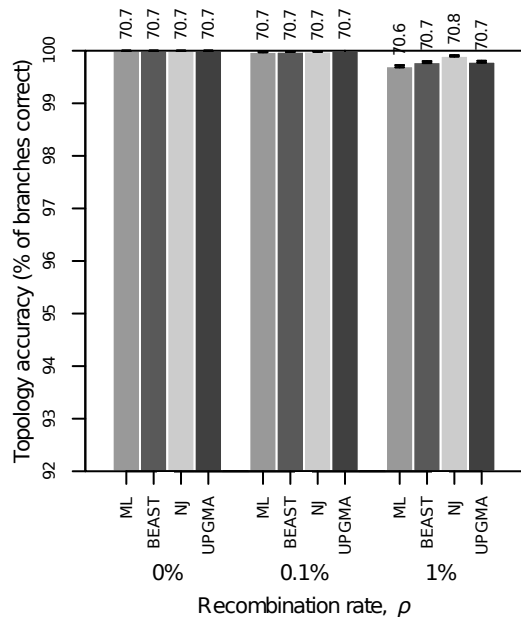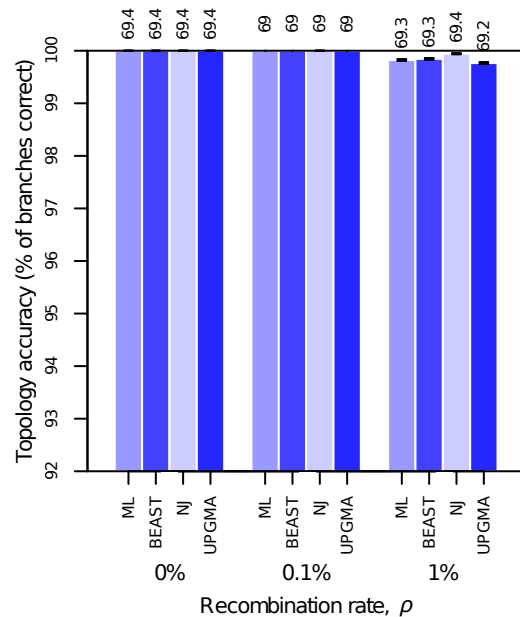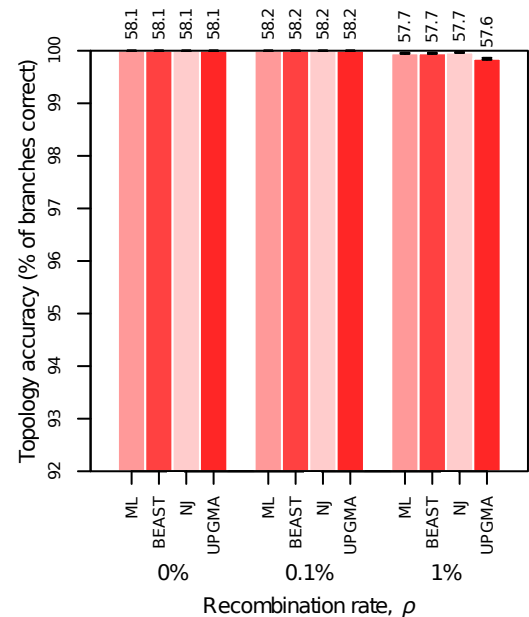

Supplement: mbo006142084sf1.pdf [file mbo006142084sf1.pdf]
