# Supplementary material for: Bacterial Phylogenetic Reconstruction from Whole Genomes Is Robust to Recombination but Demographic Inference Is Not
Source: PubMed Central journal article supplement (PMC4251999; doi:10.1128/mbio.02158-14), 2014-11-25

# Figure S2

Distance from root: 0.00 - 0.84

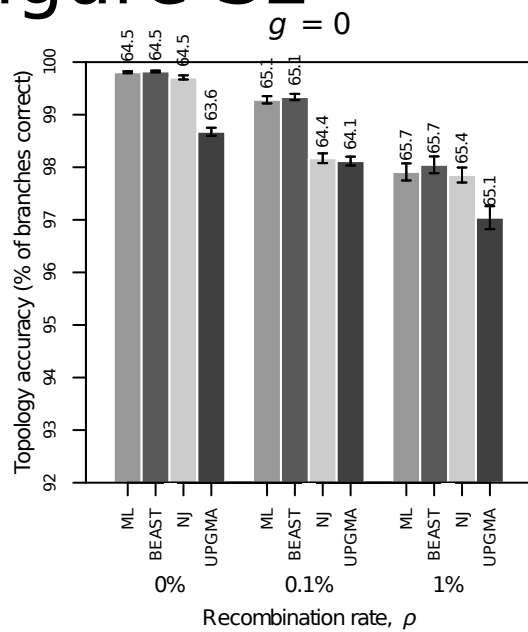

Distance from root: 0.00 - 0.62

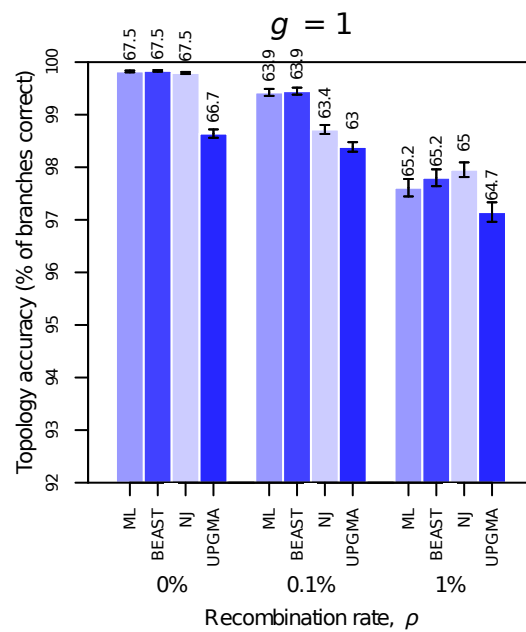

Distance from root: 0.00 - 0.21

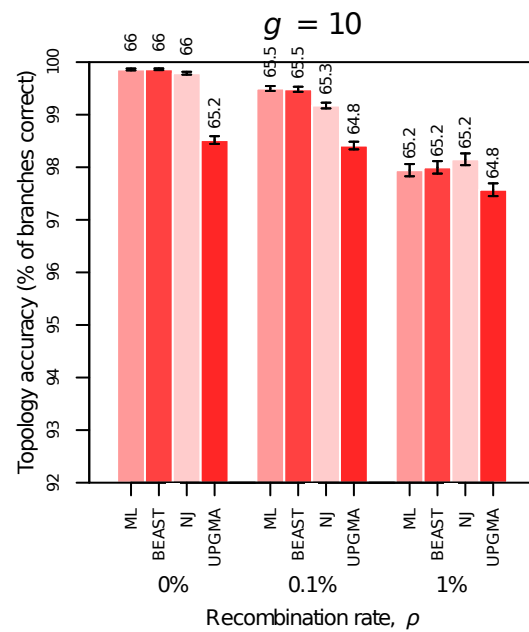

Distance from root: 0.84 - 2.17

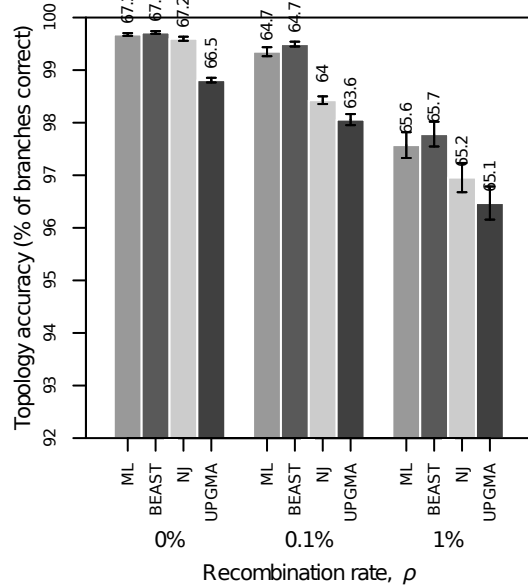

Distance from root: 0.62 - 1.25

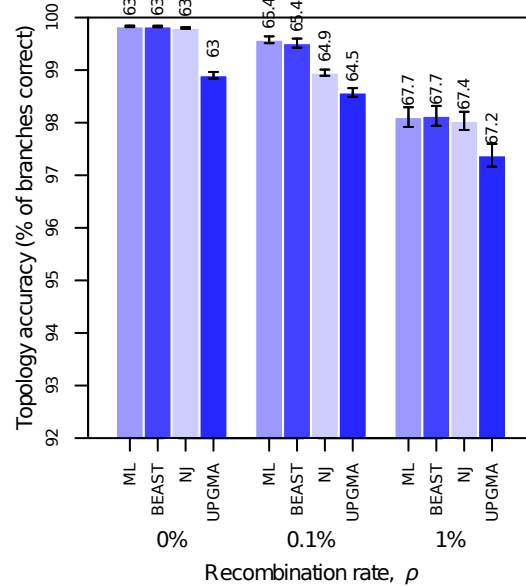

Distance from root: 0.21 - 0.33

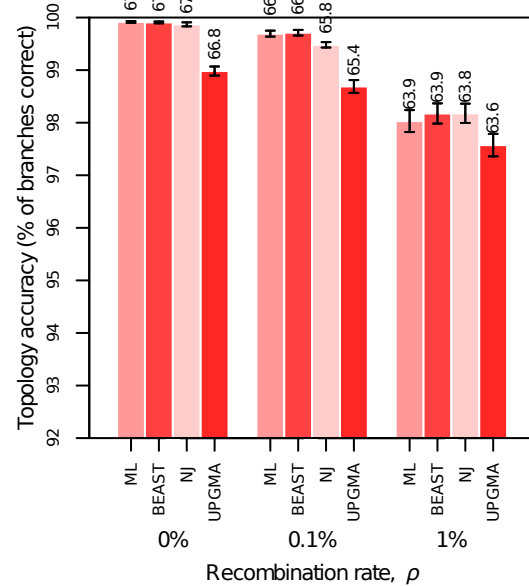

Distance from root: 2.17 - 16.79

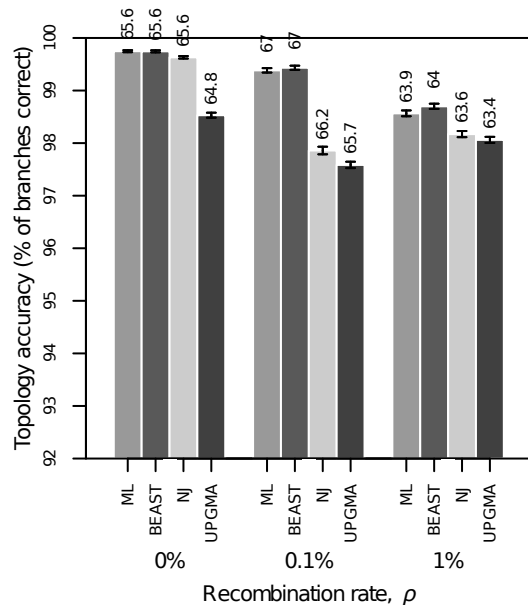

Distance from root: 1.25 - 4.48

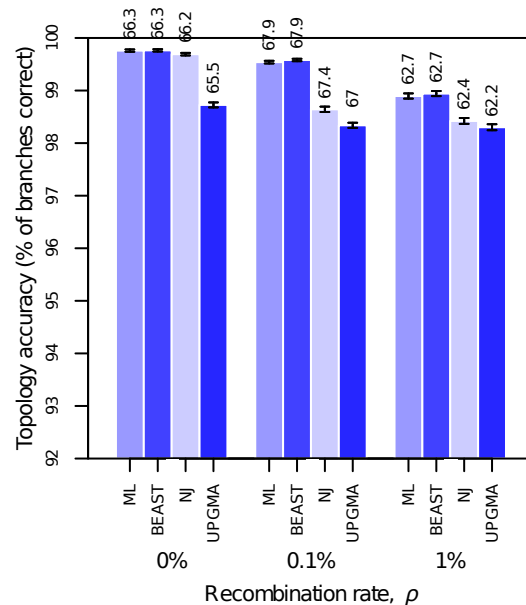

Distance from root: 0.33 - 0.76

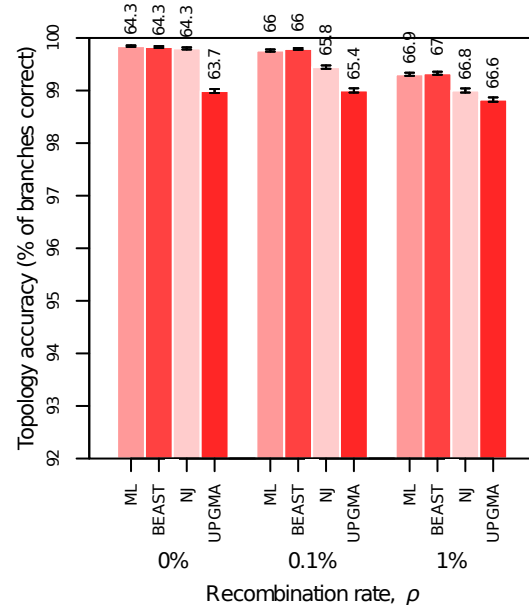

Supplement: mbo006142084sf2.pdf [file mbo006142084sf2.pdf]
